# Supplementary material for: Limited proteolysis in porous membrane reactors containing immobilized trypsin
Source: Royal Society of Chemistry journal article supplement (doi:10.1039/c7an00778g), 2017-01-01
Supplement: c7an00778g1.pdf [file c7an00778g1.pdf]

Electronic Supplementary Information for

**Limited Proteolysis in Porous Membrane Reactors Containing Immobilized Trypsin**

Jinlan Dong,<sup>†,a</sup> Wenjing Ning,<sup>†,a</sup> Weijing Liu,<sup>b</sup> and Merlin L. Bruening<sup>\*,b,c</sup>

---

<sup>a</sup> Department of Chemistry, Michigan State University, East Lansing, Michigan 48824, United States

<sup>b</sup> Department of Chemistry, University of Notre Dame, Notre Dame, IN 46556, United States

<sup>c</sup> Department of Chemical & Biomolecular Eng., University of Notre Dame, Notre Dame, IN 46556, United States

<sup>†</sup> Authors contributed to this paper equally.

\*Email: mbruening@nd.edu. Phone: (574)631-3024

Figure S-1. SEM images of modified membranes.

Figure S-2. Plot following the kinetics of in-solution BAEE digestion.

Figure S-3. Mass spectra of  $\beta$ -casein digested in trypsin-containing membranes (electrostatic enzyme immobilization).

Figure S-4. Mass spectra of  $\beta$ -casein digested in trypsin-containing membranes (covalent enzyme immobilization).

Figure S-5. Mass spectrum of apomyoglobin digested in a trypsin-containing membrane.

Table S-1. Peptides detected during MS analysis of an in-membrane digest of apomyoglobin (electrostatically immobilized trypsin).

Figure S-6. Mass spectra of apomyoglobin digested in solution.

Figure S-7. Manually deconvoluted mass spectra of apomyoglobin digested in solution.

Figure S-8. Mass spectrum of cytochrome-c digested in trypsin-containing membranes (electrostatically immobilized trypsin)

Table S-2. Peptides detected through MS analysis of a 15-min in-solution digest of apomyoglobin.

Table S-3. Peptides detected through MS analysis of a 30-min in-solution digest of apomyoglobin.

Table S-4. Peptides detected during MS analysis of an in-membrane digest of cytochrome-c (electrostatically immobilized trypsin).

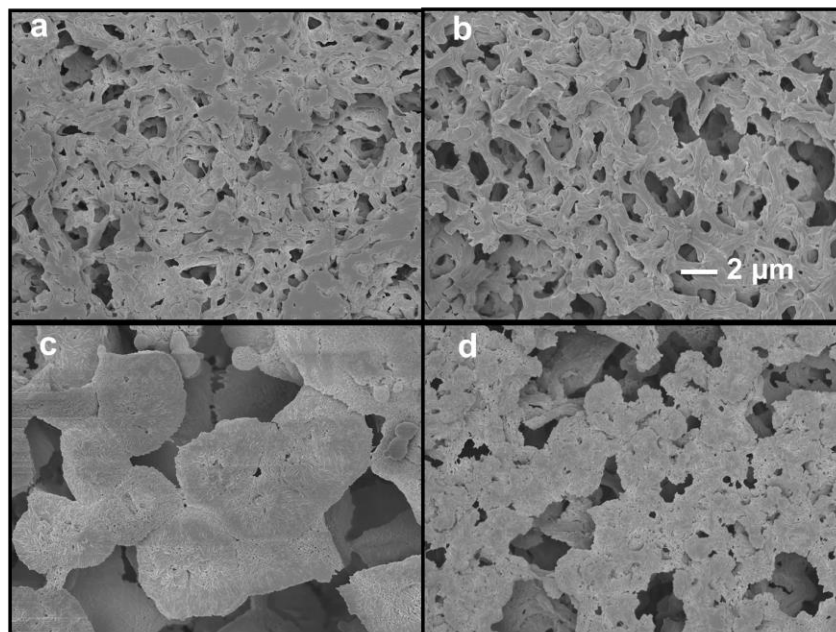

**Figure S-1.** SEM images (a-c) of membranes modified with trypsin using electrostatic adsorption. Nominal pore sizes prior to modification were (a) 0.45  $\mu\text{m}$ , (b) 1.2  $\mu\text{m}$ , and (c) 5.0  $\mu\text{m}$ . Image (d) shows a 1.2  $\mu\text{m}$  membrane modified with trypsin covalently immobilized to adsorbed PAA. The scale bar is the same for all SEM images.

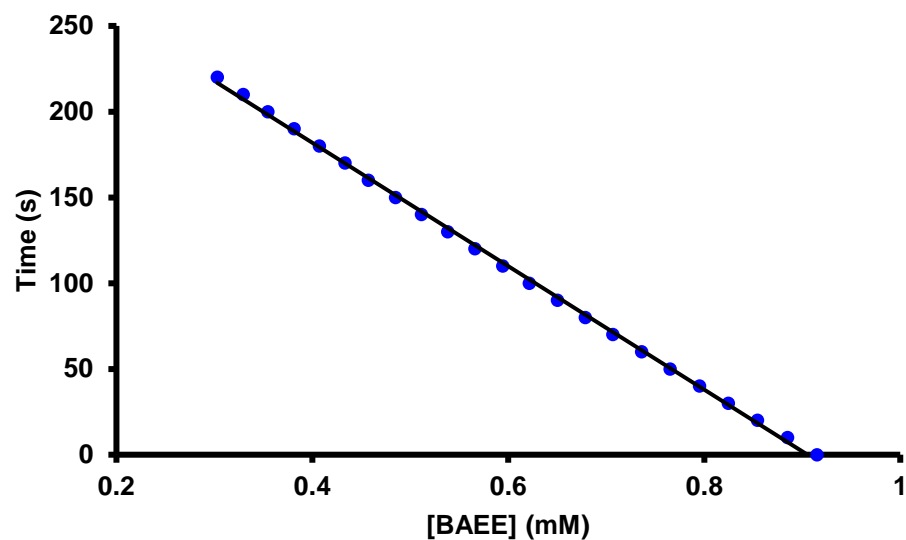

**Figure S-2.** In-solution digestion time as a function of the evolving (declining) BAEE concentration. The initial BAEE concentration in the solution was 1 mM, but this value decreased during the brief (5 s) mixing period. The line is a fit to the data using the equation below.

$$t \cong \frac{[S]_0 - [S]}{V_{max}}$$

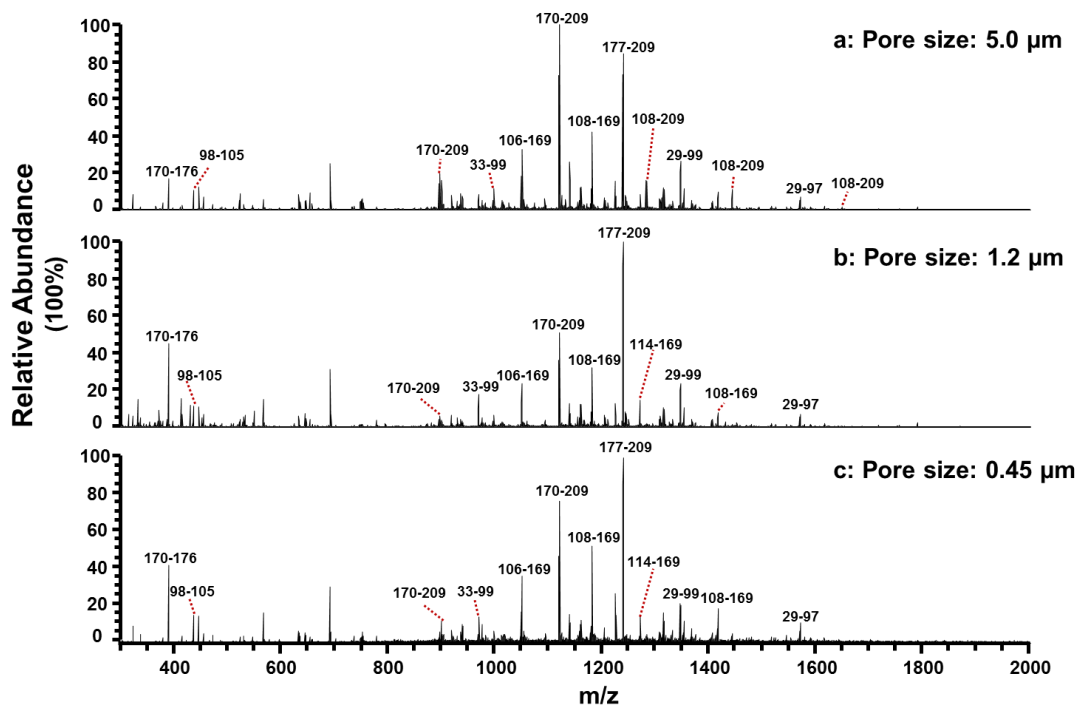

**Figure S-3.** ESI-Orbitrap mass spectra of  $\beta$ -casein digested in trypsin-containing membranes (electrostatic immobilization) with pore sizes of (a) 5.0  $\mu\text{m}$ , (b) 1.2  $\mu\text{m}$  and (c) 0.45  $\mu\text{m}$ . The flow rate through the membranes was 120 mL/h (residence time of 3.3 ms).

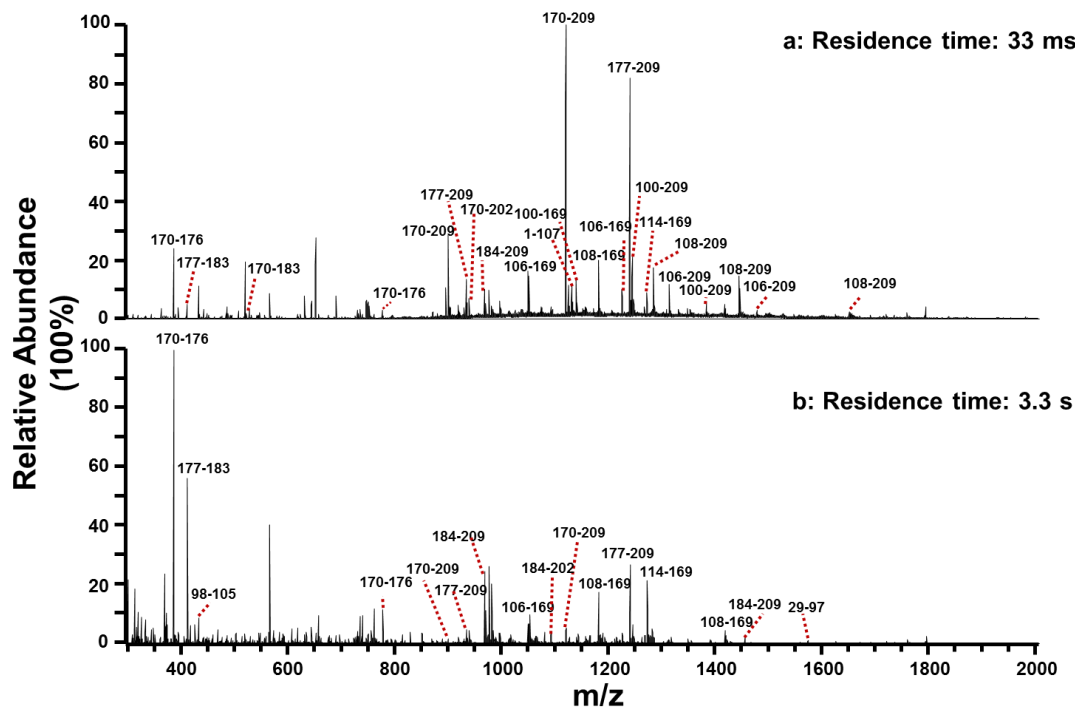

**Figure S-4.** ESI-Orbitrap mass spectra of  $\beta$ -casein digested in trypsin-containing membranes (covalent immobilization to PAA, pore sizes of 1.2  $\mu\text{m}$ ) using residence times of (a) 33 ms and (b) 3.3 s.

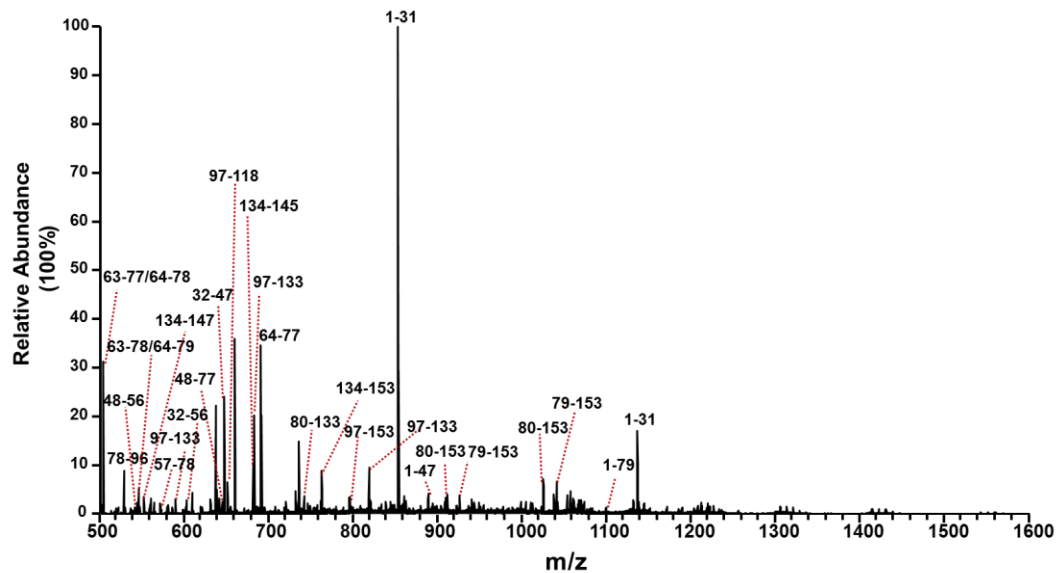

**Figure S-5.** Electrospray ionization mass spectrum of apomyoglobin digested in a membrane (1.2  $\mu\text{m}$  pores) containing electrostatically immobilized trypsin. The flow rate through the membrane was 120 mL/h (residence time of 3.3 ms).

Table S-1. Masses and sequences of peptides detected during MS analysis of an in-membrane digest of apomyoglobin. Digestion employed a residence time of 3.3 ms, and a membrane (1.2  $\mu\text{m}$  pores) containing electrostatically immobilized trypsin.

| <b>[M+H]<sup>+</sup></b> | <b>Sequence</b> |
|--------------------------|-----------------|
| 8777.77                  | 1-79            |
| 8312.36                  | 79-153          |
| 8184.28                  | 80-153          |
| 6349.34                  | 97-153          |
| 5920.09                  | 80-133          |
| 5321.77                  | 1-47            |
| 4085.14                  | 97-133          |
| 3776.00                  | 32-56           |
| 3403.76                  | 1-31            |
| 3345.89                  | 48-78           |
| 3004.60                  | 32-56           |
| 2283.00                  | 134-153         |
| 2278.35                  | 57-78           |
| 2110.16                  | 78-96           |
| 1982.08                  | 79-96           |
| 1937.02                  | 32-47           |
| 1857.97                  | 48-63           |
| 1853.96                  | 80-96           |
| 1651.93                  | 134-147         |
| 1635.03                  | 63-78/64-79     |
| 1553.80                  | 140-153         |
| 1506.94                  | 63-77/64-78     |
| 1378.84                  | 64-77           |
| 1360.76                  | 134-145         |
| 1271.68                  | 32-42           |
| 1086.58                  | 48-56           |
| 941.48                   | 146-153         |
| 790.44                   | 57-63           |
| 748.44                   | 134-139         |

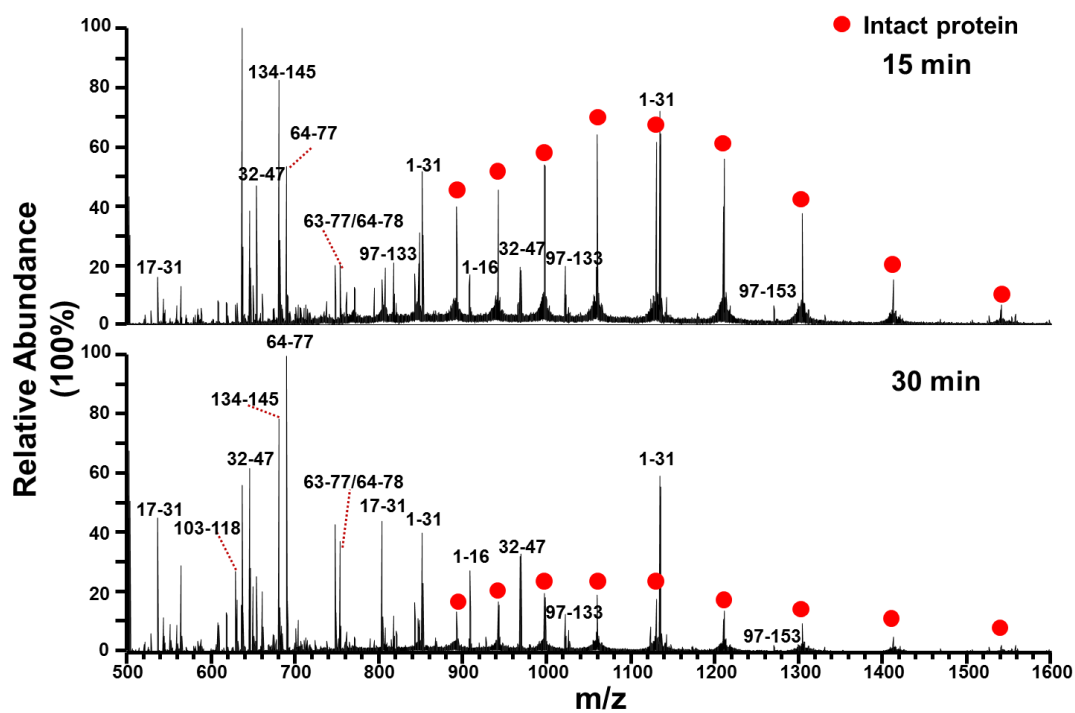

**Figure S-6.** Electrospray ionization mass spectra of apomyoglobin digested in solution for (a) 15 min and (b) 30 min with a trypsin to apomyoglobin ratio of 1:20. Red circles indicate signals from intact apomyoglobin.



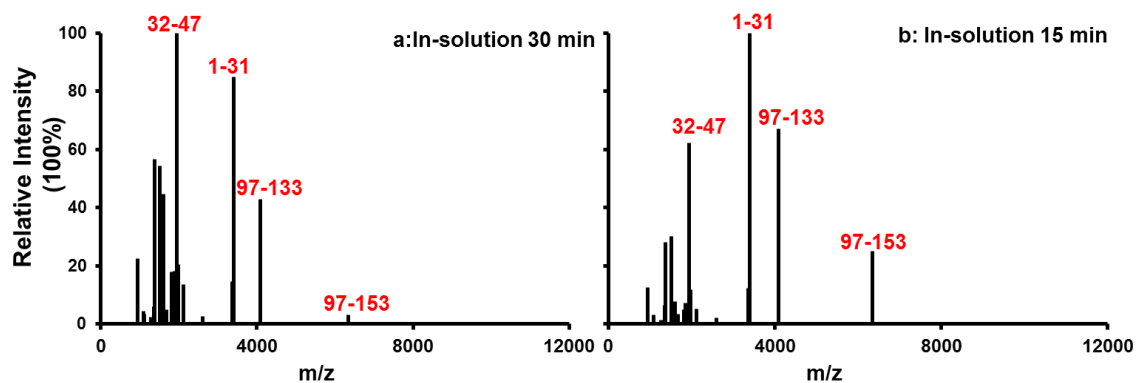

**Figure S-7.** Manually deconvoluted mass spectra of apomyoglobin digested in solution for (a) 30 min and (b) 15 min with a trypsin to protein ratio of 1:20. Figure S-6 shows the original spectra. The mass of the intact protein lies outside the plotted range.

Table S-2. Masses and sequences of peptides detected during MS analysis of a 15-min in-solution digest of apomyoglobin.

| <b>[M+H]<sup>+</sup></b> | <b>Sequence</b> |
|--------------------------|-----------------|
| 6348.35                  | 97-153          |
| 4085.16                  | 97-133          |
| 3403.75                  | 1-31            |
| 3368.68                  | 103-133         |
| 2601.5                   | 97-118          |
| 2110.16                  | 78-96           |
| 1982.08                  | 79-96           |
| 1937.04                  | 32-47           |
| 1885.03                  | 103-118         |
| 1853.90                  | 80-96           |
| 1815.90                  | 1-16            |
| 1635.04                  | 63-78/64-79     |
| 1606.87                  | 17-31           |
| 1506.94                  | 63-77/64-78     |
| 1378.84                  | 64-77           |
| 1360.78                  | 134-145         |
| 1271.68                  | 32-42           |
| 1086.56                  | 48-56           |
| 941.48                   | 146-153         |

Table S-3. Masses and sequences of peptides detected during MS analysis of a 30-min in-solution digest of apomyoglobin.

| <b>[M+H]<sup>+</sup></b> | <b>Sequence</b>                    |
|--------------------------|------------------------------------|
| 6348.35                  | 97-153                             |
| 4085.16                  | 97-133                             |
| 3403.75                  | 1-31                               |
| 3368.68                  | 103-133                            |
| 2601.5                   | 97-118                             |
| 2110.16                  | 78-96                              |
| 1982.08                  | 79-96                              |
| 1937.04                  | 32-47                              |
| 1885.03                  | 103-118                            |
| 1853.90                  | 80-96                              |
| 1815.90                  | 1-16                               |
| 1635.04                  | 63-78/64-79                        |
| 1606.87                  | 17-31                              |
| 1506.94                  | 63-77/64-78                        |
| 1378.84                  | 64-77                              |
| 1360.78                  | 134-145                            |
| 1271.68                  | 32-42                              |
| 1102.56                  | 48-56 <sup>55</sup> M<br>Oxidation |
| 1086.56                  | 48-56                              |
| 941.48                   | 146-153                            |

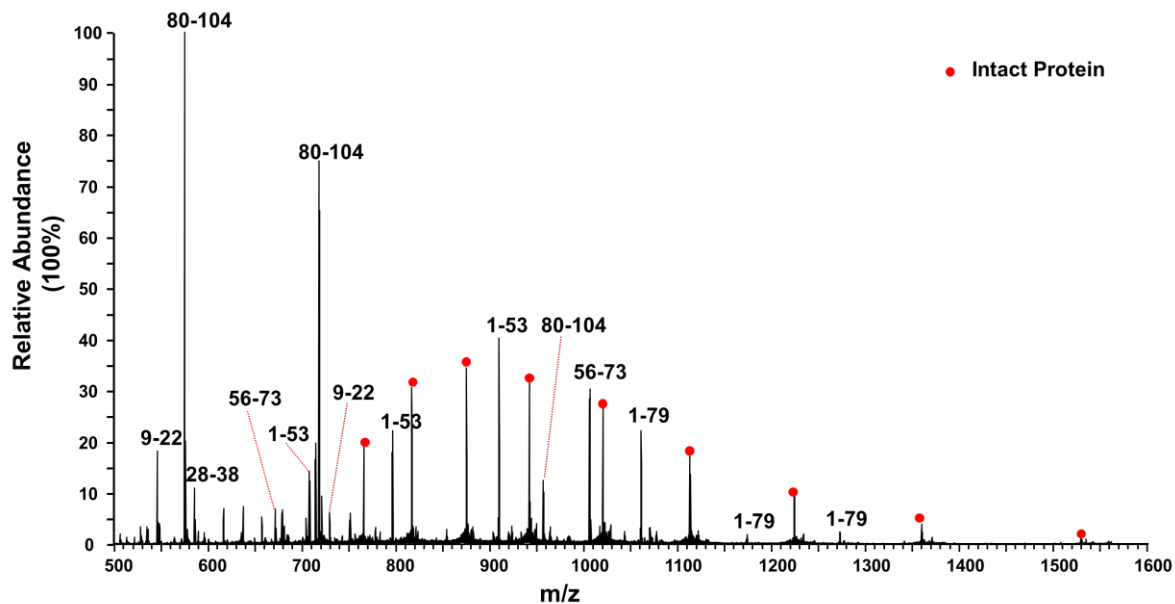

**Figure S-8.** Electrospray ionization mass spectrum of cytochrome-c digested in a membrane (1.2  $\mu\text{m}$  pores) containing electrostatically immobilized trypsin. The flow rate through the membrane was 12 mL/h (residence time of 33 ms). Red circles indicate signals from intact cytochrome-c.

Table S-4. Masses and sequences of peptides detected during MS analysis of an in-membrane digest of cytochrome-c. Digestion employed a residence time of 33 ms, and a membrane (1.2  $\mu\text{m}$  pores) containing electrostatically immobilized trypsin.

| <b>[M+H]<sup>+</sup></b> | <b>Amino Acids</b> |
|--------------------------|--------------------|
| 2866.60                  | 80-104             |
| 9376.72                  | 1-79               |
| 1168.63                  | 28-38              |
| 1633.63                  | 9-22               |
| 4909.33                  | 1-39               |
| 6364.12                  | 1-53               |
| 779.46                   | 80-86              |
| 2138.06                  | 56-73              |
| 964.54                   | 92-99              |
| 678.38                   | 74-79              |
| 634.40                   | 9-13               |
